# Supplementary material for: Catalytic oxidation of NO over MnO2 with different crystal structures
Source: Royal Society of Chemistry journal article supplement (doi:10.1039/c6ra10103h), 2016-01-01
Supplement: c6ra10103h1.pdf [file c6ra10103h1.pdf]

## Catalytic oxidation of NO over MnO<sub>2</sub> with different crystal structures

Hu Chen, Ying Wang, Yong-Kang Lv\*

*Key Laboratory of Coal Science and Technology, Ministry of Education and Shanxi Province, Taiyuan University  
of Technology, Taiyuan 030024, Shanxi, China*

*\* Corresponding author. Tel(Fax): +86 351 6010386; E-mail address: lykang@tyut.edu.cn (Y.-K. Lv).*

### ***Supplemental figure caption:***

**Fig. S1** The EDS of  $\alpha$ -MnO<sub>2</sub> catalyst.

The EDS analyses shows that  $\alpha$ -MnO<sub>2</sub> has K<sup>+</sup> ions which located in the tunnel structure because the material is derived from KMnO<sub>4</sub> (Fig. S1).

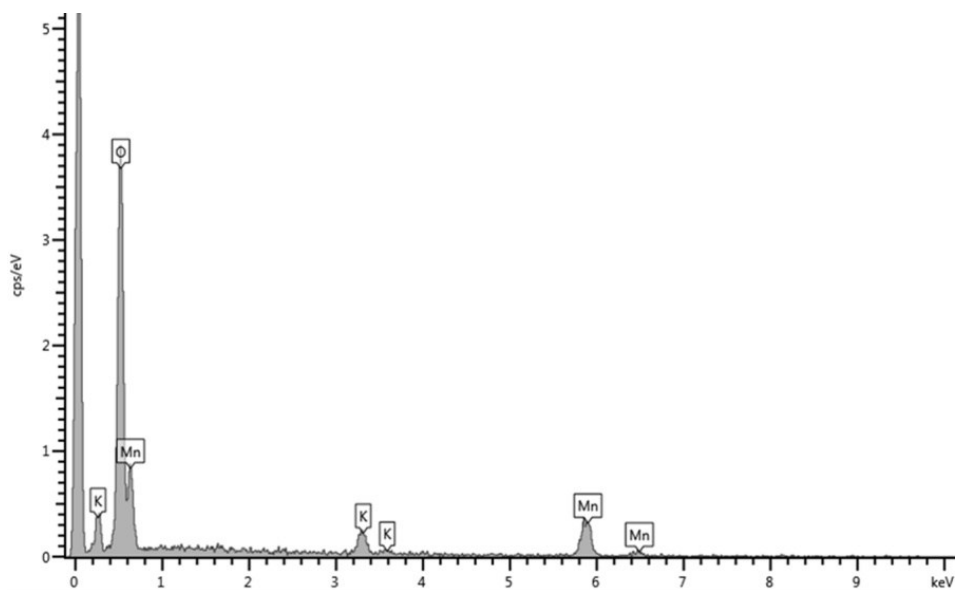

**Fig. S1**
